# Supplementary material
Source: publisher figshare collection journal article supplement (https://springernature.figshare.com/articles/dataset/_/7822808)

Figure S2 (Burns)

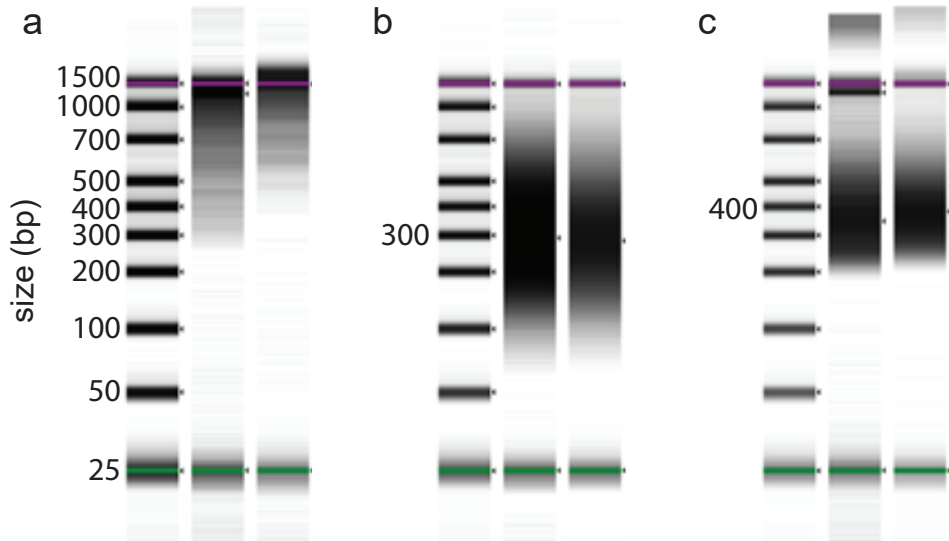

Supplement: Supplementary file [file 14554307]
